# Supplementary material for: In situ study of the competitive adsorption of ions at an organic-aqueous two-phase interface: the essential role of the Hofmeister effect
Source: Royal Society of Chemistry journal article supplement (doi:10.1039/c9sm00007k), 2019-01-01
Supplement: c9sm00007k1.pdf [file c9sm00007k1.pdf]

1 The aqueous box containing different concentration of ions was constructed in  
 2 a box with the size of  $70 \times 70 \times 70 \text{ \AA}^3$ . The components in the systems were given  
 3 in the Table S1 in the supporting information. First, the energies of the initial  
 4 configuration in simulation boxes were minimized by using the steepest descent  
 5 algorithm. Afterward, the reasonable size of simulation box was obtained with 1  
 6 ns constant-NPT simulation (time step 1 fs). Then, the pre-equilibrium of system  
 7 was conducted with 0.5 ns constant-NVT simulation (time step 1 fs). Finally, two  
 8 dichloromethane organic boxes with a thickness of  $50 \text{ \AA}$  were added at the both  
 9 sides of aqueous box. A constant-NVT simulation was performed for 50 ns to  
 10 make sure that systems reached the equilibrium. Langevin thermostat was used  
 11 to control temperature at 298 K.<sup>1</sup> Langevin barostat was used to control pressure  
 12 at 1 atm.<sup>2</sup> The longrange electrostatic interactions was calculated by using  
 13 particle mesh ewald (PME) method.<sup>2</sup> Lennard-Jones (LJ) pair potentials were  
 14 evaluated within a cutoff of 1.2 nm. Lorentz-Berthelot rules was used to calculate  
 15 the cross-interaction parameters.<sup>3</sup> VMD was used to analyze the trajectory of  
 16 simulation.<sup>4</sup>

17

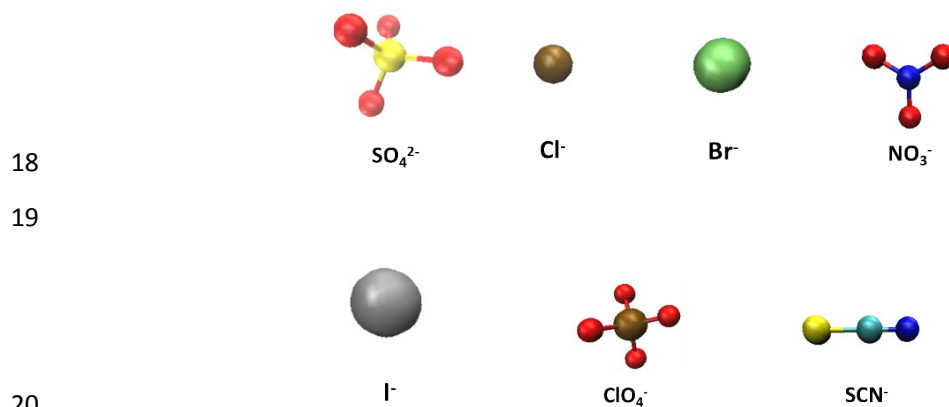

1

Figure S1. The optimal geometry structure of anions.

2

3

Table S1. Number of different components in the systems investigated.

| Components                                                    | Water | Na <sup>+</sup> | CrO <sub>4</sub> <sup>2-</sup> | X <sup>a</sup> | CH <sub>2</sub> Cl <sub>2</sub> |
|---------------------------------------------------------------|-------|-----------------|--------------------------------|----------------|---------------------------------|
| CrO <sub>4</sub> <sup>2-</sup> -SO <sub>4</sub> <sup>2-</sup> | 9999  | 1300            | 50                             | 600            | 4000                            |
| CrO <sub>4</sub> <sup>2-</sup> -Cl <sup>-</sup>               | 9999  | 700             | 50                             | 600            | 4000                            |
| CrO <sub>4</sub> <sup>2-</sup> -Br <sup>-</sup>               | 9999  | 700             | 50                             | 600            | 4000                            |
| CrO <sub>4</sub> <sup>2-</sup> -NO <sub>3</sub> <sup>-</sup>  | 9999  | 700             | 50                             | 600            | 4000                            |
| CrO <sub>4</sub> <sup>2-</sup> -I <sup>-</sup>                | 9999  | 700             | 50                             | 600            | 4000                            |
| CrO <sub>4</sub> <sup>2-</sup> -ClO <sub>4</sub> <sup>-</sup> | 9999  | 700             | 50                             | 600            | 4000                            |
| CrO <sub>4</sub> <sup>2-</sup> -SCN <sup>-</sup>              | 9999  | 700             | 50                             | 600            | 4000                            |

4 a) X represent SO<sub>4</sub><sup>2-</sup>, Cl<sup>-</sup>, Br<sup>-</sup>, NO<sub>3</sub><sup>-</sup>, I<sup>-</sup>, ClO<sub>4</sub><sup>-</sup>, SCN<sup>-</sup>, in different systems.

5

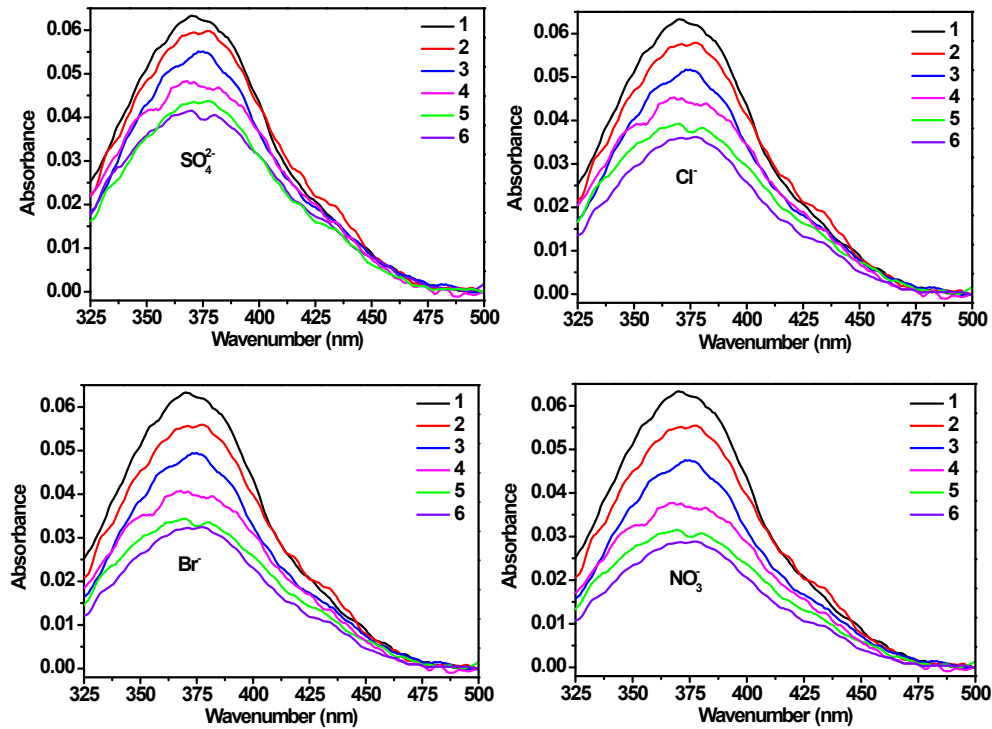

6

7

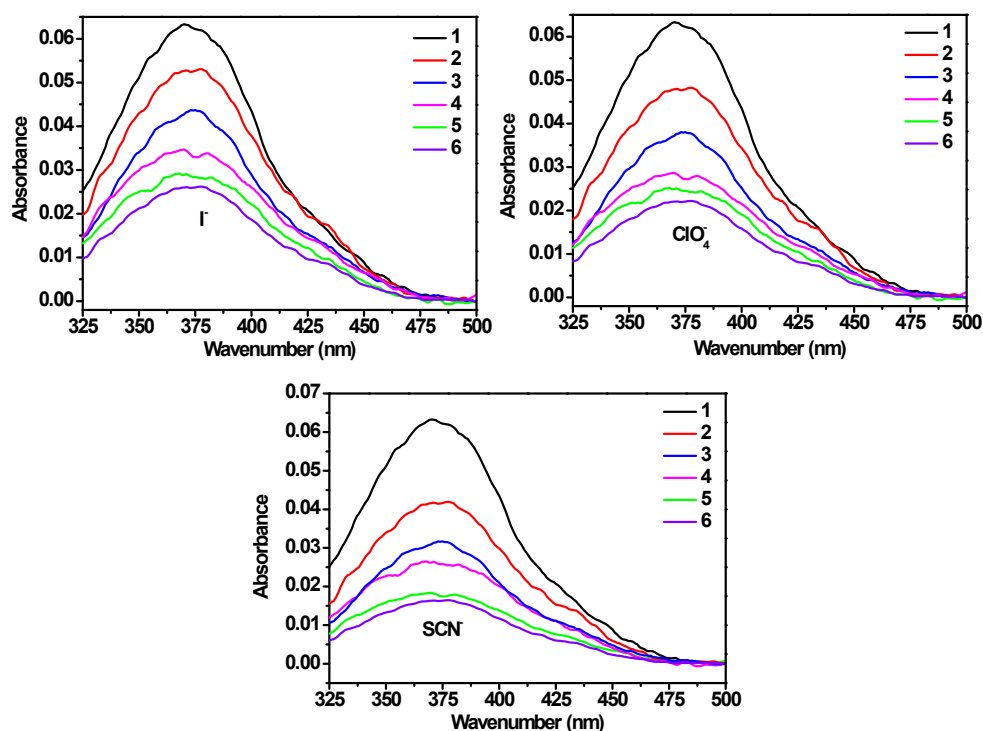

1

2

3 Figure S2. The UV-visible attenuated total reflection spectroscopy of  $\text{Na}_2\text{CrO}_4$   
 4 solutions with different concentration of various salt ions (curves 1, 2, 3, 4, 5, 6  
 5 represent different salts ( $\text{Na}_2\text{SO}_4$ ,  $\text{NaCl}$ ,  $\text{NaBr}$ ,  $\text{NaNO}_3$ ,  $\text{NaI}$ ,  $\text{NaClO}_4$ ,  $\text{NaSCN}$ )  
 6 concentration of 0, 0.04, 0.1, 0.15, 0.3, 0.5 mol/L, respectively, the concentration of  
 7 chromate ions in the aqueous solutions were 5 mmol/L, aqueous pH were 12).

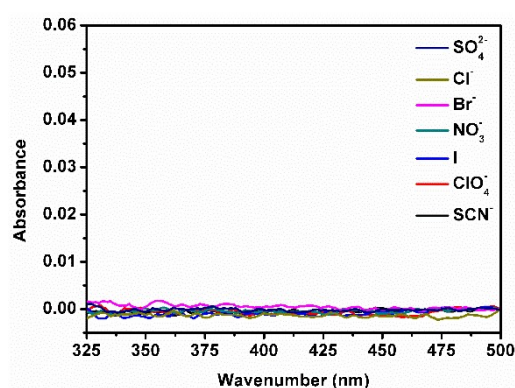

8

9 Figure S3. The UV-visible attenuated total reflection spectroscopy of salt solutions with  
 10 various salt ions and corresponding ATR-UV absorbance for different salt ions. (The  
 11 concentration of salt ions in the aqueous solutions were 0.5 mol/L, aqueous pH were  
 12 12)

1

## 2 **References:**

3 [1] S. E. Feller, Y. Zhang, R. W. Pastor, B. R. Brooks, Constant-pressure  
4 molecular-dynamic simulation-the langevin-piston method, J. Chem. Phys. 103  
5 (1995) 4613–4621.

6 [2] T. Darden, D. York, L. Pedersen, Particle mesh ewald-an  $n \cdot \log(n)$  method  
7 for ewald sums in large systems, J. Chem. Phys. 98 (1993) 10089–10092.

8 [3] J. O. Hirschfelder, C. F. Curtiss, R. B. Bird, Molecular theory of gases and  
9 liquids; Wiley: New York, 1954, 656.

10 [4] W. Humphrey, A. Dalke, K. Schulten, VMD: visual molecular dynamics J.  
11 Mol. Graph. 14 (1996) 33–38.

12
